# Supplementary material for: Evaluation of Therapeutic Targets in Histological Subtypes of Bladder Cancer
Source: MDPI journal article supplement (doi:10.3390/ijms222111547), 2021-10-26
Supplement: s1 [file s1]

Table S1. correlation analyses of clinico-pathological parameters and markers.

|                |           | Grading                 | pT<br>status | Gender        | Age            | AR           | PDL1           | EGFR   | FGFR3          | Nectin4 | Trop2        |               |
|----------------|-----------|-------------------------|--------------|---------------|----------------|--------------|----------------|--------|----------------|---------|--------------|---------------|
| Spearman's rho | Grading   | Correlation Coefficient | 1,000        | 0,095         | 0,117          | <b>,182*</b> | 0,093          | 0,093  | -0,071         | -0,073  | 0,188        | -0,119        |
|                |           | Sig. (2-tailed)         |              | 0,270         | 0,142          | <b>0,021</b> | 0,264          | 0,278  | 0,395          | 0,403   | 0,054        | 0,208         |
|                |           | N                       | 162          | 137           | 159            | <b>160</b>   | 146            | 137    | 145            | 133     | 106          | 113           |
|                | pT status | Correlation Coefficient | 0,095        | 1,000         | -0,075         | -0,162       | <b>-,190*</b>  | 0,073  | 0,126          | 0,139   | -0,026       | <b>,222*</b>  |
|                |           | Sig. (2-tailed)         | 0,270        |               | 0,380          | 0,055        | <b>0,030</b>   | 0,415  | 0,142          | 0,121   | 0,796        | <b>0,022</b>  |
|                |           | N                       | 137          | 146           | 140            | 141          | <b>131</b>     | 125    | 137            | 125     | 100          | <b>106</b>    |
|                | Gender    | Correlation Coefficient | 0,117        | -0,075        | 1,000          | -0,042       | <b>,181*</b>   | -0,127 | <b>-,237**</b> | -0,103  | -0,003       | -0,176        |
|                |           | Sig. (2-tailed)         | 0,142        | 0,380         |                | 0,589        | 0,027          | 0,133  | 0,003          | 0,233   | 0,978        | 0,057         |
|                |           | N                       | 159          | 140           | 166            | 166          | 150            | 142    | 150            | 137     | 111          | 118           |
|                | Age       | Correlation Coefficient | <b>,182*</b> | -0,162        | -0,042         | 1,000        | -0,013         | -0,134 | -0,035         | -0,138  | <b>,228*</b> | 0,024         |
|                |           | Sig. (2-tailed)         | 0,021        | 0,055         | 0,589          |              | 0,879          | 0,110  | 0,668          | 0,106   | 0,016        | 0,797         |
|                |           | N                       | 160          | 141           | 166            | 167          | 151            | 143    | 151            | 138     | 112          | 119           |
|                | AR        | Correlation Coefficient | 0,093        | <b>-,190*</b> | <b>,181*</b>   | -0,013       | 1,000          | -0,121 | <b>-,247**</b> | -0,020  | 0,131        | -0,140        |
|                |           | Sig. (2-tailed)         | 0,264        | <b>0,030</b>  | <b>0,027</b>   | 0,879        |                | 0,152  | <b>0,002</b>   | 0,814   | 0,165        | 0,127         |
|                |           | N                       | 146          | <b>131</b>    | <b>150</b>     | 151          | 165            | 142    | <b>151</b>     | 142     | 114          | 121           |
|                | PDL1      | Correlation Coefficient | 0,093        | 0,073         | -0,127         | -0,134       | -0,121         | 1,000  | 0,153          | 0,041   | -0,112       | -0,039        |
|                |           | Sig. (2-tailed)         | 0,278        | 0,415         | 0,133          | 0,110        | 0,152          |        | 0,068          | 0,648   | 0,224        | 0,664         |
|                |           | N                       | 137          | 125           | 142            | 143          | 142            | 152    | 143            | 129     | 119          | 125           |
|                | EGFR      | Correlation Coefficient | -0,071       | 0,126         | <b>-,237**</b> | -0,035       | <b>-,247**</b> | 0,153  | 1,000          | 0,137   | -0,109       | <b>,274**</b> |
|                |           | Sig. (2-tailed)         | 0,395        | 0,142         | <b>0,003</b>   | 0,668        | <b>0,002</b>   | 0,068  |                | 0,102   | 0,250        | <b>0,002</b>  |
|                |           | N                       | 145          | 137           | <b>150</b>     | 151          | <b>151</b>     | 143    | 163            | 143     | 114          | <b>121</b>    |
|                | Nectin4   | Correlation Coefficient | 0,188        | -0,026        | -0,003         | <b>,228*</b> | 0,131          | -0,112 | -0,109         | -0,005  | 1,000        | -0,101        |
|                |           | Sig. (2-tailed)         | 0,054        | 0,796         | 0,978          | <b>0,016</b> | 0,165          | 0,224  | 0,250          | 0,958   |              | 0,293         |
|                |           | N                       | 106          | 100           | 111            | <b>112</b>   | 114            | 119    | 114            | 107     | 119          | 111           |
|                | Trop2     | Correlation Coefficient | -0,119       | <b>,222*</b>  | -0,176         | 0,024        | -0,140         | -0,039 | <b>,274**</b>  | 0,129   | -0,101       | 1,000         |
|                |           | Sig. (2-tailed)         | 0,208        | <b>0,022</b>  | 0,057          | 0,797        | 0,127          | 0,664  | <b>0,002</b>   | 0,173   | 0,293        |               |
|                |           | N                       | 113          | <b>106</b>    | 118            | 119          | 121            | 125    | <b>121</b>     | 113     | 111          | 126           |

\*, Correlation is significant at the 0.05 level (2-tailed)\*\*; Correlation is significant at the 0.01 level (2-tailed); significance values are presented in bold face.
